# Supplementary material for: Management of Central Venous Catheters in Children and Adults on Home Parenteral Nutrition: A French Survey of Current Practice
Source: MDPI journal article supplement (doi:10.3390/nu14122532), 2022-06-18
Supplement: s1 [file s1]

**Table S1. Indications of venous vascular imaging**

| <b>Clinical situation</b>           | <b>Pediatric centers (n=21)</b> | <b>Adult centers (n=13)</b> | <b><i>p</i></b> |
|-------------------------------------|---------------------------------|-----------------------------|-----------------|
| Before a first CVC                  | 3 (14%)                         | 3 (23%)                     | 0.85            |
| d-US                                | 3                               | 3                           |                 |
| Thrombosis                          | 15 (71%)                        | 9 (69%)                     | 1               |
| d-US                                | 12                              | 7                           |                 |
| Angio CT                            | 2                               | 4                           |                 |
| Angio MR                            | 2                               | 0                           |                 |
| CRBSI                               | 6 (29%)                         | 5 (38%)                     | 0.82            |
| d-US                                | 5                               | 5                           |                 |
| TTE                                 | 2                               | 0                           |                 |
| Unexplained biological inflammation | 4 (19%)                         | 3 (23%)                     | 1               |
| d-US                                | 4                               | 1                           |                 |
| TTE                                 | 1                               | 0                           |                 |
| PET                                 | 0                               | 1                           |                 |
| Angio CT                            | 0                               | 2                           |                 |
| Before CVC replacement              | 16 (76%)                        | 6 (46%)                     | 0.16            |
| d-US                                | 15                              | 5                           |                 |
| Angio CT                            | 1                               | 3                           |                 |

CVC: central venous catheter. d-US: Doppler ultrasound. CT: computed tomography. MR: magnetic resonance. CRBSI: catheter related blood stream infection. TTE: trans thoracic echocardiography. PET: positron emission tomography.
